# Supplementary material
Source: ML conference proceedings conference paper supplement (https://proceedings.neurips.cc/paper_files/paper/2020/hash/4e0928de075538c593fbdabb0c5ef2c3-Abstract.html)
Supplement: Supplementary file [file 4e0928de075538c593fbdabb0c5ef2c3-Supplemental.pdf]

## Supplementary material

### Additional results on PASCAL VOC

In Tab. S1 and Tab. S2, we report the per-category detection APs and localization CorLocs on the *test* and *trainval* splits of PASCAL VOC 2007, respectively. Compared to other WSOD methods without external modules or data, we observe: (1) Our UWSOD outperforms all others on most categories (19 categories for APs and CorLocs). (2) The largest improvement in terms of AP is from category *cow*, which has gains of 37.9. (3) The performance of hard categories in our UWSOD, *i.e.*, *boat*, *chair* and *plant*, still surpass other methods by 10.3, 0.3 and 5.0 AP points, respectively. With class-agnostic ground-truth bounding-box known, we observe that the per-category performance of proposed UWSOD is competitive to that of Fast/Faster RCNN.

Table S1: Comparison with the state-of-the-art methods on PASCAL VOC 2007 in terms of AP (%) on *test*.

| Method                                                           | Backbone | aero | bicy | bird | boa  | bot  | bus  | car  | cat  | cha  | cow  | dtab | dog  | hors | mbik | pers | plnt | she  | sofa | tra  | tv   | Av.  |
|------------------------------------------------------------------|----------|------|------|------|------|------|------|------|------|------|------|------|------|------|------|------|------|------|------|------|------|------|
| WSOD with external object proposal modules or additional data    |          |      |      |      |      |      |      |      |      |      |      |      |      |      |      |      |      |      |      |      |      |      |
| Multi-Fold MIL [6]                                               | AlexNet  | 39.3 | 43.0 | 28.8 | 20.4 | 8.0  | 45.5 | 47.9 | 22.1 | 8.4  | 33.5 | 23.6 | 29.2 | 38.5 | 47.9 | 20.3 | 20.0 | 35.8 | 30.8 | 41.0 | 20.1 | 30.2 |
| WSDDN [7]                                                        | VGG16    | 39.4 | 50.1 | 31.5 | 16.3 | 12.6 | 64.5 | 42.8 | 42.6 | 10.1 | 35.7 | 24.9 | 38.2 | 34.4 | 55.6 | 9.4  | 14.7 | 30.2 | 40.7 | 54.7 | 46.9 | 34.8 |
| ContextLocNet [29]                                               | VGG-F    | 57.1 | 52.0 | 31.5 | 7.6  | 11.5 | 55.0 | 53.1 | 34.1 | 1.7  | 33.1 | 49.2 | 42.0 | 47.3 | 56.6 | 15.3 | 12.8 | 24.8 | 48.9 | 44.4 | 47.8 | 36.3 |
| WCCN [64]                                                        | VGG16    | 49.5 | 60.6 | 38.6 | 29.2 | 16.2 | 70.8 | 56.9 | 42.5 | 10.9 | 44.1 | 29.9 | 42.2 | 47.9 | 64.1 | 13.8 | 23.5 | 45.9 | 54.1 | 60.8 | 54.5 | 42.8 |
| Jie <i>et al.</i> [34]                                           | VGG16    | 52.2 | 47.1 | 35.0 | 26.7 | 15.4 | 61.3 | 66.0 | 54.3 | 3.0  | 53.6 | 24.7 | 43.6 | 48.4 | 65.8 | 6.6  | 18.8 | 51.9 | 43.6 | 53.6 | 62.4 | 41.7 |
| TST [56]                                                         | AlexNet  | -    | -    | -    | -    | -    | -    | -    | -    | -    | -    | -    | -    | -    | -    | -    | -    | -    | -    | -    | -    | 33.8 |
| SGWSOD [78]                                                      | VGG16    | 48.4 | 61.5 | 33.3 | 30.0 | 15.3 | 72.4 | 62.4 | 59.1 | 10.9 | 42.3 | 34.3 | 53.1 | 48.4 | 65.0 | 20.5 | 16.6 | 40.6 | 46.5 | 54.6 | 55.1 | 43.5 |
| TS <sup>C</sup> 2 [32]                                           | VGG16    | 59.3 | 57.5 | 43.7 | 27.3 | 13.5 | 63.9 | 61.7 | 59.9 | 24.1 | 46.9 | 36.7 | 45.6 | 39.9 | 62.6 | 10.3 | 23.6 | 41.7 | 52.4 | 58.7 | 56.6 | 44.3 |
| CSC C5 [31]                                                      | VGG16    | 51.4 | 62.0 | 35.2 | 18.7 | 27.9 | 66.7 | 53.5 | 51.4 | 16.2 | 43.6 | 43.0 | 46.7 | 20.0 | 58.4 | 31.1 | 23.8 | 43.6 | 48.8 | 65.4 | 53.5 | 43.0 |
| WS-JDS [48]                                                      | VGG16    | 52.0 | 64.5 | 45.5 | 26.7 | 27.9 | 60.5 | 47.8 | 59.7 | 13.0 | 50.4 | 46.4 | 56.3 | 49.6 | 60.7 | 25.4 | 28.2 | 50.0 | 51.4 | 66.5 | 29.7 | 45.6 |
| OICR [8]                                                         | VGG16    | 58.0 | 62.4 | 31.1 | 19.4 | 13.0 | 65.1 | 62.2 | 28.4 | 24.8 | 44.7 | 30.6 | 25.3 | 37.8 | 65.5 | 15.7 | 24.1 | 41.7 | 46.9 | 64.3 | 62.6 | 41.2 |
| K-EM [80]                                                        | VGG16    | 59.8 | 64.6 | 47.8 | 28.8 | 21.4 | 67.7 | 70.3 | 61.2 | 17.2 | 51.5 | 34.0 | 42.3 | 48.8 | 65.9 | 9.3  | 21.1 | 53.6 | 51.4 | 54.7 | 50.7 | 46.1 |
| MELM [41]                                                        | VGG16    | 55.6 | 66.9 | 34.2 | 29.1 | 16.4 | 68.8 | 68.1 | 43.0 | 25.0 | 65.6 | 45.3 | 53.2 | 49.6 | 68.6 | 2.0  | 25.4 | 52.5 | 56.8 | 62.1 | 57.1 | 47.3 |
| ZLDN [38]                                                        | VGG16    | 55.4 | 68.5 | 50.1 | 16.8 | 20.8 | 62.7 | 66.8 | 56.5 | 2.1  | 57.8 | 47.5 | 40.1 | 69.7 | 68.2 | 21.6 | 27.2 | 53.4 | 56.1 | 52.5 | 58.2 | 47.6 |
| GAL-FWSD512 [47]                                                 | VGG16    | 58.4 | 63.8 | 45.8 | 24.0 | 22.7 | 67.7 | 65.7 | 58.9 | 15.0 | 58.1 | 47.0 | 53.7 | 23.8 | 64.3 | 36.2 | 22.3 | 46.7 | 50.3 | 70.8 | 55.1 | 47.5 |
| ML-LocNet [42]                                                   | VGG16    | 59.3 | 68.9 | 45.7 | 29.0 | 24.5 | 64.8 | 68.4 | 59.3 | 18.6 | 49.1 | 50.2 | 43.1 | 65.8 | 70.2 | 19.9 | 24.3 | 48.1 | 54.2 | 62.8 | 41.8 | 48.4 |
| WSRPN [111]                                                      | VGG16    | 57.9 | 70.5 | 37.8 | 5.7  | 21.0 | 66.1 | 69.2 | 59.4 | 3.4  | 57.1 | 57.3 | 35.2 | 64.2 | 68.6 | 32.8 | 28.6 | 50.8 | 49.5 | 41.1 | 30.0 | 45.3 |
| PCL [36]                                                         | VGG16    | 54.4 | 69.0 | 39.3 | 19.2 | 15.7 | 62.9 | 64.4 | 30.0 | 25.1 | 52.5 | 44.4 | 19.6 | 39.3 | 67.7 | 17.8 | 22.9 | 46.6 | 57.5 | 58.6 | 63.0 | 43.5 |
| Kosugi <i>et al.</i> [37]                                        | VGG16    | 61.5 | 64.8 | 43.7 | 26.4 | 17.1 | 67.4 | 62.4 | 67.8 | 25.4 | 51.0 | 33.7 | 47.6 | 51.2 | 65.2 | 19.3 | 24.4 | 44.6 | 54.1 | 65.6 | 59.5 | 47.6 |
| C-MIL [43]                                                       | VGG16    | 62.5 | 58.4 | 49.5 | 32.1 | 19.8 | 70.5 | 66.1 | 63.4 | 20.0 | 60.5 | 52.9 | 53.5 | 57.4 | 68.9 | 8.4  | 24.6 | 51.8 | 58.7 | 66.7 | 63.5 | 50.5 |
| Pred Net [44]                                                    | VGG16    | 66.7 | 69.5 | 52.8 | 31.4 | 24.7 | 74.5 | 74.1 | 67.3 | 14.6 | 53.0 | 46.1 | 52.9 | 69.9 | 70.8 | 18.5 | 28.4 | 54.6 | 60.7 | 67.1 | 60.4 | 52.9 |
| OICR W-RPN [112]                                                 | VGG16    | -    | -    | -    | -    | -    | -    | -    | -    | -    | -    | -    | -    | -    | -    | -    | -    | -    | -    | -    | -    | 46.9 |
| SDCN [49]                                                        | VGG16    | 59.8 | 67.1 | 32.0 | 34.7 | 22.8 | 67.1 | 63.8 | 67.9 | 22.5 | 48.9 | 47.8 | 60.5 | 51.7 | 65.2 | 11.8 | 20.6 | 42.1 | 54.7 | 60.8 | 64.3 | 48.3 |
| Sona <i>et al.</i> [81]                                          | VGG16    | 62.1 | 55.7 | 42.0 | 31.1 | 17.2 | 67.6 | 65.2 | 50.8 | 20.4 | 51.5 | 36.3 | 34.1 | 46.2 | 65.8 | 12.3 | 21.9 | 48.8 | 55.4 | 60.2 | 65.7 | 45.4 |
| WSOD <sup>2</sup> [18]                                           | VGG16    | 65.1 | 64.8 | 57.2 | 39.2 | 24.3 | 69.8 | 66.2 | 61.0 | 29.8 | 64.6 | 42.5 | 60.1 | 71.2 | 70.7 | 21.9 | 28.1 | 58.6 | 59.7 | 52.2 | 64.8 | 53.6 |
| OICR+GAM+REG [35]                                                | VGG16    | 55.2 | 66.5 | 40.1 | 31.1 | 16.9 | 69.8 | 64.3 | 67.8 | 27.8 | 52.9 | 47.0 | 33.0 | 60.8 | 64.4 | 13.8 | 26.0 | 44.0 | 55.7 | 68.9 | 65.5 | 48.6 |
| C-MIDN [50]                                                      | VGG16    | 53.3 | 71.5 | 49.8 | 26.1 | 20.3 | 70.3 | 69.9 | 68.3 | 28.7 | 65.3 | 45.1 | 64.6 | 58.0 | 71.2 | 20.0 | 27.5 | 54.9 | 54.9 | 69.4 | 63.5 | 52.6 |
| OIM+R [39]                                                       | VGG16    | 55.6 | 67.0 | 45.8 | 27.9 | 21.1 | 69.0 | 68.3 | 70.5 | 21.3 | 60.2 | 40.3 | 54.5 | 56.5 | 70.1 | 12.5 | 25.0 | 52.9 | 55.2 | 65.0 | 63.7 | 50.1 |
| Ren <i>et al.</i> [20]                                           | VGG16    | 68.8 | 77.7 | 57.0 | 27.7 | 28.9 | 69.1 | 74.5 | 67.0 | 32.1 | 73.2 | 48.1 | 45.2 | 54.4 | 73.7 | 35.0 | 29.3 | 64.1 | 53.8 | 65.3 | 65.2 | 54.9 |
| Zeni <i>et al.</i> [82]                                          | VGG16    | 68.6 | 62.4 | 55.5 | 27.2 | 21.4 | 71.1 | 71.6 | 56.7 | 24.7 | 60.3 | 47.4 | 56.1 | 46.4 | 69.2 | 2.7  | 22.9 | 41.5 | 47.7 | 71.1 | 69.8 | 49.7 |
| Pgen [113]                                                       | VGG16    | 63.0 | 64.4 | 50.1 | 27.5 | 17.1 | 70.6 | 66.0 | 71.1 | 25.8 | 55.9 | 43.2 | 62.7 | 65.9 | 64.1 | 10.2 | 22.5 | 48.1 | 53.8 | 72.2 | 67.4 | 51.1 |
| WSOD without external object proposal modules or additional data |          |      |      |      |      |      |      |      |      |      |      |      |      |      |      |      |      |      |      |      |      |      |
| Beam Search [62]                                                 | VGG16    | -    | -    | -    | -    | -    | -    | -    | -    | -    | -    | -    | -    | -    | -    | -    | -    | -    | -    | -    | -    | 25.7 |
| OM+MIL [33]                                                      | AlexNet  | 37.2 | 35.7 | 25.8 | 13.8 | 12.7 | 36.2 | 42.4 | 22.3 | 14.3 | 24.2 | 9.4  | 13.1 | 27.9 | 38.9 | 3.7  | 18.7 | 20.1 | 16.3 | 36.1 | 18.4 | 23.4 |
| OPG [84]                                                         | VGG16    | 48.9 | 49.9 | 25.6 | 14.0 | 6.1  | 47.1 | 22.5 | 52.7 | 3.4  | 19.6 | 33.2 | 33.3 | 55.3 | 30.2 | 9.9  | 9.1  | 14.8 | 25.8 | 50.8 | 24.7 | 28.8 |
| SPAM-CAM [63]                                                    | VGG16    | -    | -    | -    | -    | -    | -    | -    | -    | -    | -    | -    | -    | -    | -    | -    | -    | -    | -    | -    | -    | 27.5 |
| UWSOD                                                            | VGG16    | 57.7 | 72.7 | 46.4 | 24.3 | 11.2 | 60.4 | 72.3 | 29.2 | 14.6 | 58.7 | 29.1 | 59.4 | 72.6 | 68.6 | 1.4  | 23.7 | 35.6 | 40.3 | 51.8 | 49.8 | 44.0 |
|                                                                  | WSR18    | 59.1 | 68.9 | 47.1 | 18.3 | 28.2 | 65.1 | 72.3 | 31.4 | 7.6  | 62.1 | 44.9 | 46.6 | 68.1 | 70.4 | 18.9 | 23.5 | 49.9 | 40.5 | 66.2 | 10.5 | 45.0 |
| FSOD                                                             |          |      |      |      |      |      |      |      |      |      |      |      |      |      |      |      |      |      |      |      |      |      |
| Fast RCNN [85]                                                   | VGG16    | 74.5 | 78.3 | 69.2 | 53.2 | 36.6 | 77.3 | 78.2 | 82.0 | 40.7 | 72.7 | 67.9 | 79.6 | 79.2 | 73.0 | 69.0 | 30.1 | 65.4 | 70.2 | 75.8 | 65.8 | 66.9 |
| Faster RCNN [2]                                                  | VGG16    | 70.0 | 80.6 | 70.1 | 57.3 | 49.9 | 78.2 | 80.4 | 82.0 | 52.2 | 75.3 | 67.2 | 80.3 | 79.8 | 75.0 | 76.3 | 39.1 | 68.3 | 67.3 | 81.1 | 67.6 | 69.9 |
| WSOD with CIs-agnostic GT-bbox Known                             |          |      |      |      |      |      |      |      |      |      |      |      |      |      |      |      |      |      |      |      |      |      |
| OICR + GAM + REG [35]                                            | VGG16    | 66.1 | 64.0 | 55.6 | 25.3 | 37.2 | 75.6 | 69.9 | 53.6 | 17.4 | 63.2 | 62.2 | 49.0 | 65.1 | 69.3 | 50.8 | 18.9 | 52.1 | 54.7 | 69.5 | 66.2 | 54.3 |
| Ren <i>et al.</i> [20]                                           | VGG16    | 70.2 | 76.1 | 57.7 | 46.2 | 42.3 | 73.8 | 72.0 | 78.5 | 35.3 | 69.4 | 46.0 | 72.1 | 76.5 | 72.4 | 64.7 | 30.5 | 65.1 | 59.2 | 69.3 | 66.0 | 62.2 |
| UWSOD                                                            | VGG16    | 74.0 | 77.6 | 66.2 | 57.8 | 51.0 | 78.0 | 74.7 | 81.5 | 43.2 | 70.5 | 67.6 | 77.8 | 81.2 | 71.1 | 67.7 | 36.7 | 59.0 | 66.1 | 78.6 | 72.0 | 67.7 |
|                                                                  | WSR18    | 73.2 | 77.6 | 69.6 | 64.4 | 50.7 | 81.4 | 77.7 | 83.9 | 44.1 | 71.0 | 69.5 | 79.3 | 81.6 | 72.3 | 70.0 | 42.0 | 63.4 | 69.1 | 82.2 | 70.9 | 69.7 |

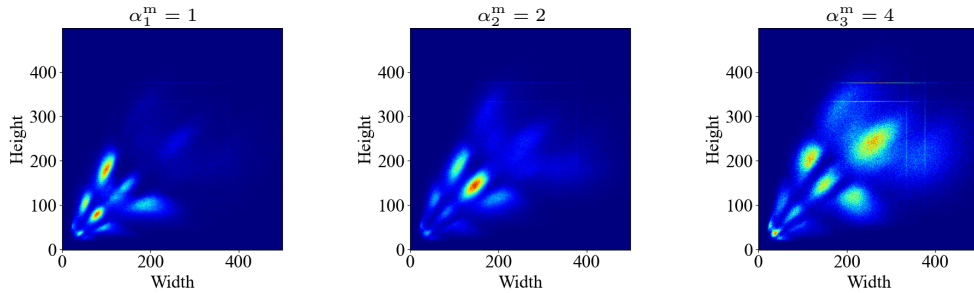

Figure S1: Proposal objectness score maps of different resampling rate  $\alpha^m$  in MRRP on PASCAL VOC 2007 test.

Table S2: Comparison with the state-of-the-art methods on PASCAL VOC 2007 in terms of CorLoc (%) on *trainval*.

| Method                                                           | Backbone | aero | bicy | bird | boa  | bot  | bus  | car  | cat  | cha  | cow  | dtab | dog  | hors | mbik | pers | plnt | she   | sofa | tra  | tv   | Av.  |
|------------------------------------------------------------------|----------|------|------|------|------|------|------|------|------|------|------|------|------|------|------|------|------|-------|------|------|------|------|
| WSOD with external object proposal modules or additional data    |          |      |      |      |      |      |      |      |      |      |      |      |      |      |      |      |      |       |      |      |      |      |
| Multi-Fold MIL [6]                                               | AlexNet  | 65.3 | 55.0 | 52.4 | 48.3 | 18.2 | 66.4 | 77.8 | 35.6 | 26.5 | 67.0 | 46.9 | 48.4 | 70.5 | 69.1 | 35.2 | 35.2 | 69.6  | 43.4 | 64.6 | 43.7 | 52.0 |
| WSDDN [7]                                                        | VGG16    | 65.1 | 58.8 | 58.5 | 33.1 | 39.8 | 68.3 | 60.2 | 59.6 | 34.8 | 64.5 | 30.5 | 43.0 | 56.8 | 82.4 | 25.5 | 41.6 | 61.5  | 55.9 | 65.9 | 63.7 | 53.5 |
| ContextLocNet [29]                                               | VGG-F    | 83.3 | 68.6 | 54.7 | 23.4 | 18.3 | 73.6 | 74.1 | 54.1 | 8.6  | 65.1 | 47.1 | 59.5 | 67.0 | 83.5 | 35.3 | 39.9 | 67.0  | 49.7 | 63.5 | 65.2 | 55.1 |
| WCCN [64]                                                        | VGG16    | 83.9 | 72.8 | 64.5 | 44.1 | 40.1 | 65.7 | 82.5 | 58.9 | 33.7 | 72.5 | 25.6 | 53.7 | 67.4 | 77.4 | 26.8 | 49.1 | 68.1  | 27.9 | 64.5 | 55.7 | 56.7 |
| Jie <i>et al.</i> '17 [34]                                       | VGG16    | 72.7 | 55.3 | 53.0 | 27.8 | 35.2 | 68.6 | 81.9 | 60.7 | 11.6 | 71.6 | 29.7 | 54.3 | 64.3 | 88.2 | 22.2 | 53.7 | 72.2  | 52.6 | 68.9 | 75.5 | 56.1 |
| TST [56]                                                         | AlexNet  | -    | -    | -    | -    | -    | -    | -    | -    | -    | -    | -    | -    | -    | -    | -    | -    | -     | -    | -    | -    | 59.5 |
| SGWSOD [78]                                                      | VGG16    | 71.0 | 76.5 | 54.9 | 49.7 | 54.1 | 78.0 | 87.4 | 68.8 | 32.4 | 75.2 | 29.5 | 58.0 | 67.3 | 84.5 | 41.5 | 49.0 | 78.1  | 60.3 | 62.8 | 78.9 | 62.9 |
| TS <sup>2</sup> C [32]                                           | VGG16    | 84.2 | 74.1 | 61.3 | 52.1 | 32.1 | 76.7 | 82.9 | 66.6 | 42.3 | 70.6 | 39.5 | 57.0 | 61.2 | 88.4 | 9.3  | 54.6 | 72.2  | 60.0 | 65.0 | 70.3 | 61.0 |
| CSC C5 [31]                                                      | VGG16    | 76.1 | 75.3 | 61.8 | 42.0 | 54.1 | 74.7 | 78.8 | 67.4 | 32.8 | 73.1 | 46.5 | 59.9 | 37.6 | 78.0 | 56.0 | 42.5 | 71.9  | 67.3 | 82.4 | 65.6 | 62.2 |
| WS-JDS [48]                                                      | VGG16    | 82.9 | 74.0 | 73.4 | 47.1 | 60.9 | 80.4 | 77.5 | 78.8 | 18.6 | 70.0 | 56.7 | 67.0 | 64.5 | 84.0 | 47.0 | 50.1 | 71.9  | 57.6 | 83.3 | 43.5 | 64.5 |
| OICR [8]                                                         | VGG16    | 81.7 | 80.4 | 48.7 | 49.5 | 32.8 | 81.7 | 85.4 | 40.1 | 40.6 | 79.5 | 35.7 | 33.7 | 60.5 | 88.8 | 21.8 | 57.9 | 76.3  | 59.9 | 75.3 | 81.4 | 60.6 |
| K-EM [80]                                                        | VGG16    | 79.8 | 77.8 | 66.7 | 50.3 | 57.0 | 80.1 | 89.9 | 71.5 | 29.9 | 75.9 | 30.5 | 58.9 | 73.2 | 90.2 | 25.4 | 51.8 | 80.2  | 60.3 | 72.4 | 78.9 | 65.0 |
| MELM [41]                                                        | VGG16    | -    | -    | -    | -    | -    | -    | -    | -    | -    | -    | -    | -    | -    | -    | -    | -    | -     | -    | -    | -    | 61.4 |
| ZLDN [38]                                                        | VGG16    | 74.0 | 77.8 | 65.2 | 37.0 | 46.7 | 75.8 | 83.7 | 58.8 | 17.5 | 73.1 | 49.0 | 51.3 | 76.7 | 87.4 | 30.6 | 47.8 | 75.0  | 62.5 | 64.8 | 68.8 | 61.2 |
| GAL-fWSD512 [47]                                                 | VGG16    | 78.6 | 81.9 | 63.6 | 40.3 | 48.8 | 80.7 | 85.3 | 30.3 | 78.0 | 54.5 | 65.3 | 48.4 | 86.5 | 56.3 | 46.9 | 76.0 | 68.1  | 83.9 | 73.1 | 66.1 | 66.1 |
| ML-LocNet [11]                                                   | VGG16    | 78.6 | 82.3 | 68.2 | 42.0 | 53.3 | 78.5 | 88.5 | 70.3 | 36.4 | 70.2 | 60.5 | 58.0 | 80.5 | 88.2 | 38.8 | 59.2 | 75.0  | 69.0 | 78.2 | 64.5 | 67.0 |
| WSRPN [42]                                                       | VGG16    | 77.5 | 81.2 | 55.3 | 19.7 | 44.3 | 80.2 | 86.6 | 69.5 | 10.1 | 87.7 | 68.4 | 52.1 | 84.4 | 91.6 | 57.4 | 63.4 | 77.3  | 58.1 | 57.0 | 53.8 | 63.8 |
| Kosugi <i>et al.</i> [37]                                        | VGG16    | 85.5 | 79.6 | 68.1 | 55.1 | 33.6 | 83.5 | 83.1 | 78.5 | 42.7 | 79.8 | 37.8 | 61.5 | 74.4 | 88.6 | 32.6 | 55.7 | 77.9  | 63.7 | 78.4 | 74.1 | 66.7 |
| C-MIL [43]                                                       | VGG16    | -    | -    | -    | -    | -    | -    | -    | -    | -    | -    | -    | -    | -    | -    | -    | -    | -     | -    | -    | -    | 65.0 |
| Pred Net [44]                                                    | VGG16    | 88.6 | 86.3 | 71.8 | 53.4 | 51.2 | 87.6 | 89.0 | 65.3 | 33.2 | 86.6 | 58.8 | 65.9 | 87.7 | 93.3 | 30.9 | 58.9 | 83.4  | 67.8 | 78.7 | 80.2 | 70.9 |
| OICR W-RPN [12]                                                  | VGG16    | -    | -    | -    | -    | -    | -    | -    | -    | -    | -    | -    | -    | -    | -    | -    | -    | -     | -    | -    | -    | 66.5 |
| SDCN [49]                                                        | VGG16    | 85.8 | 83.1 | 56.2 | 58.5 | 44.7 | 80.2 | 85.0 | 77.9 | 29.6 | 78.8 | 53.6 | 74.2 | 73.1 | 88.4 | 18.2 | 57.5 | 74.2  | 60.8 | 76.1 | 79.2 | 66.8 |
| WSDO <sup>2</sup> [18]                                           | VGG16    | 87.1 | 80.0 | 74.8 | 60.1 | 36.6 | 79.2 | 83.8 | 70.6 | 43.5 | 88.4 | 46.0 | 74.7 | 87.4 | 90.8 | 44.2 | 52.4 | 81.4  | 61.8 | 67.7 | 79.9 | 69.5 |
| OICR+GAM+REG [35]                                                | VGG16    | 81.7 | 81.2 | 58.9 | 54.3 | 37.8 | 83.2 | 86.2 | 77.0 | 42.1 | 83.6 | 51.3 | 44.9 | 78.2 | 90.8 | 20.5 | 56.8 | 74.2  | 66.1 | 81.0 | 86.0 | 66.8 |
| C-MIDN [50]                                                      | VGG16    | -    | -    | -    | -    | -    | -    | -    | -    | -    | -    | -    | -    | -    | -    | -    | -    | -     | -    | -    | -    | 68.7 |
| OIM+IR [39]                                                      | VGG16    | -    | -    | -    | -    | -    | -    | -    | -    | -    | -    | -    | -    | -    | -    | -    | -    | -     | -    | -    | -    | 67.2 |
| Ren <i>et al.</i> [20]                                           | VGG16    | 87.5 | 82.4 | 76.0 | 58.0 | 44.7 | 82.2 | 87.5 | 71.2 | 49.1 | 81.5 | 51.7 | 53.3 | 71.4 | 92.8 | 38.2 | 52.8 | 79.4  | 61.0 | 78.3 | 76.0 | 68.8 |
| Zeni <i>et al.</i> [82]                                          | VGG16    | 86.7 | 73.3 | 72.4 | 55.3 | 46.9 | 83.2 | 87.5 | 64.5 | 44.6 | 76.7 | 46.4 | 70.9 | 67.0 | 88.0 | 9.6  | 56.4 | 69.1  | 52.4 | 79.8 | 82.8 | 65.7 |
| PG-PS [13]                                                       | VGG16    | 85.4 | 80.4 | 69.1 | 58.0 | 35.9 | 82.7 | 86.7 | 82.6 | 45.5 | 84.9 | 44.1 | 80.2 | 84.0 | 89.2 | 12.3 | 55.7 | 79.4  | 63.4 | 82.1 | 82.1 | 69.2 |
| WSOD without external object proposal modules or additional data |          |      |      |      |      |      |      |      |      |      |      |      |      |      |      |      |      |       |      |      |      |      |
| Shi <i>et al.</i> [83]                                           | -        | 67.3 | 54.4 | 34.3 | 17.8 | 1.3  | 46.6 | 60.7 | 68.9 | 2.5  | 32.4 | 16.2 | 58.9 | 51.5 | 64.6 | 18.2 | 3.1  | 20.9  | 34.7 | 63.4 | 5.9  | 36.2 |
| OM+MIL [33]                                                      | AlexNet  | 64.3 | 54.3 | 42.7 | 22.7 | 34.4 | 58.1 | 74.3 | 36.2 | 24.3 | 50.4 | 11.0 | 29.2 | 50.5 | 66.1 | 11.3 | 42.9 | 39.6  | 18.3 | 54.0 | 39.8 | 41.2 |
| OPG [84]                                                         | VGG16    | 57.1 | 43.2 | 53.9 | 23.8 | 12.3 | 47.9 | 48.8 | 69.1 | 16.6 | 47.5 | 39.0 | 61.3 | 54.7 | 60.8 | 32.1 | 22.0 | 49.0  | 44.1 | 59.4 | 27.7 | 43.5 |
| UWSOD                                                            | VGG16    | 77.8 | 85.8 | 66.0 | 56.0 | 39.1 | 74.2 | 91.4 | 41.4 | 30.3 | 81.9 | 33.0 | 78.9 | 90.5 | 85.6 | 7.6  | 46.4 | 68.8  | 67.0 | 76.1 | 61.7 | 63.0 |
|                                                                  | WSR18    | 80.4 | 85.3 | 79.4 | 42.0 | 65.5 | 78.4 | 90.7 | 49.7 | 18.8 | 73.9 | 48.5 | 63.1 | 87.8 | 90.8 | 37.4 | 47.4 | 77.1  | 54.1 | 81.9 | 23.4 | 63.8 |
| WSOD with Cls-agnostic GT-bbox Known                             |          |      |      |      |      |      |      |      |      |      |      |      |      |      |      |      |      |       |      |      |      |      |
| OICR + GAM + REG [35]                                            | VGG16    | 91.9 | 82.7 | 87.2 | 65.4 | 69.7 | 92.7 | 92.2 | 82.8 | 45.9 | 88.4 | 80.4 | 84.7 | 89.9 | 90.8 | 79.8 | 59.4 | 89.5  | 79.2 | 90.5 | 83.5 | 81.3 |
| Ren <i>et al.</i> [20]                                           | VGG16    | 95.3 | 94.5 | 93.0 | 83.1 | 68.5 | 92.8 | 91.8 | 93.0 | 69.8 | 86.4 | 71.2 | 89.1 | 92.9 | 96.3 | 88.9 | 75.4 | 93.8  | 82.6 | 92.4 | 89.4 | 87.1 |
| UWSOD                                                            | VGG16    | 98.4 | 96.8 | 96.6 | 98.0 | 81.9 | 96.6 | 96.7 | 97.1 | 78.2 | 98.6 | 82.5 | 96.3 | 97.3 | 95.2 | 95.1 | 80.3 | 97.9  | 91.5 | 98.5 | 92.1 | 93.3 |
|                                                                  | WSR18    | 99.1 | 96.6 | 97.8 | 91.4 | 81.3 | 93.8 | 95.5 | 94.5 | 70.1 | 95.7 | 90.7 | 97.0 | 98.6 | 97.5 | 94.7 | 81.2 | 100.0 | 91.0 | 97.6 | 86.0 | 92.5 |

### Additional analysis of MRRP

In Fig. S1, we show the proposal objectness score maps of different resampling rates in MRRP with  $n^m = 3$  and  $\alpha^m = \{1, 2, 4\}$ . We accumulate the objectness scores of proposals with the same height and width from PASCAL VOC 2007 *test*. Then we map the accumulated objectness scores to the jet colourmap. We find that different resampling rates tend to favour different sizes of proposals. With large resampling rates, the number of the large proposals with high objectness scores is much more than that of small ones. And small resampling rates, *e.g.*,  $\alpha^m = 1$ , predict more small proposals with high objectness scores. It demonstrates that our MRRP uses the in-network feature hierarchy to handle large scale variation.
